# Supplementary material for: Contribution of lone-pairs to birefringence affected by the Pb(ii) coordination environment: a DFT investigation
Source: Royal Society of Chemistry journal article supplement (doi:10.1039/c5cp03584h), 2015-01-01
Supplement: c5cp03584h1.pdf [file c5cp03584h1.pdf]

## Electronic Supplementary Information

### **Contribution of lone-pairs to birefringence affected by Pb(II) coordination environment: A DFT investigation**

Qun Jing<sup>a,b</sup>, Zhihua Yang<sup>a\*</sup>, Shilie Pan<sup>a\*</sup>, Dongfeng Xue<sup>c</sup>

<sup>a</sup>Key Laboratory of Functional Materials and Devices for Special Environments,  
Xinjiang Technical Institute of Physics & Chemistry, Chinese Academy of Sciences;  
Xinjiang Key Laboratory of Electronic Information Materials and Devices, 40-1  
South Beijing Road, Urumqi 830011, China.

E-mail: zhyang@ms.xjb.ac.cn (Zhihua Yang) Tel: (86)-991-3810816. Fax: (86)991-  
3838957.

E-mail: slpan@ms.xjb.ac.cn (Shilie Pan) Tel: (86)-991-3674558. Fax: (86)-991-  
3838957

<sup>b</sup>Department of Physics, School of Sciences, Shihezi University, Shihezi 832000,  
China.

<sup>c</sup>State Key Laboratory of Rare Earth Resource Utilization, Changchun Institute of  
Applied Chemistry, Chinese Academy of Sciences, Changchun 130022, China

## Numerical calculations details

After the electronic structures obtained, the imaginary part of the dielectric constant  $\epsilon_2(\omega)$  can be obtained by

$$\epsilon_2 = \frac{2e^2\pi}{\Omega\epsilon_0} \sum_{k,v,c} | \langle \varphi_k^c | u \cdot r | \varphi_k^v \rangle |^2 \delta(E_k^c - E_k^v - E) \quad (1)$$

In which  $\Omega$  is the volume of the elemental cell,  $v$ , and  $c$  represent the valence and conduction bands, respectively, and  $u$  is the vector defining the polarization of the electric field of the incident light. Since the dielectric constant describes a causal response, the real and imaginary parts are linked by a Kramers-Kronig transform. This transform is used to obtain the real part of the dielectric function,  $\epsilon_1(\omega)$ , and then the refractive index  $n$ . In this paper, in order to get reliable refractive indices and birefringence, the number of conduction bands was set as three times that of valence bands.

During the calculation, under the norm-conserving pseudopotential (NCP), for  $\text{Pb}_2\text{BO}_3\text{F}$ ,  $\text{Pb}_2\text{B}_5\text{O}_9\text{Cl}$ ,  $\text{PbB}_4\text{O}_7$  and  $\text{PbBa}_2(\text{B}_3\text{O}_6)_2$ , the following orbital electrons were treated as valence electrons: Pb:5d<sup>10</sup>6s<sup>2</sup>6p<sup>2</sup>, Ba:5s<sup>2</sup>5p<sup>6</sup>6s<sup>2</sup>, B:2s<sup>2</sup>2p<sup>1</sup>, O:2s<sup>2</sup>2p<sup>4</sup>, F:2s<sup>2</sup>2p<sup>5</sup>, Cl:3s<sup>2</sup>3p<sup>5</sup>.
